# Supplementary material for: Impact of viral presence in tumor on gene expression in non-small cell lung cancer
Source: Springer Nature journal article supplement (doi:10.1186/s12885-018-4748-0), 2018-08-22

**Supplementary Figure 1.** Expression Patterns of 639 Genes Differentially Altered Between Virus-infected (n=21) and Uninfected NSCLC Tumor Specimens (n=15)

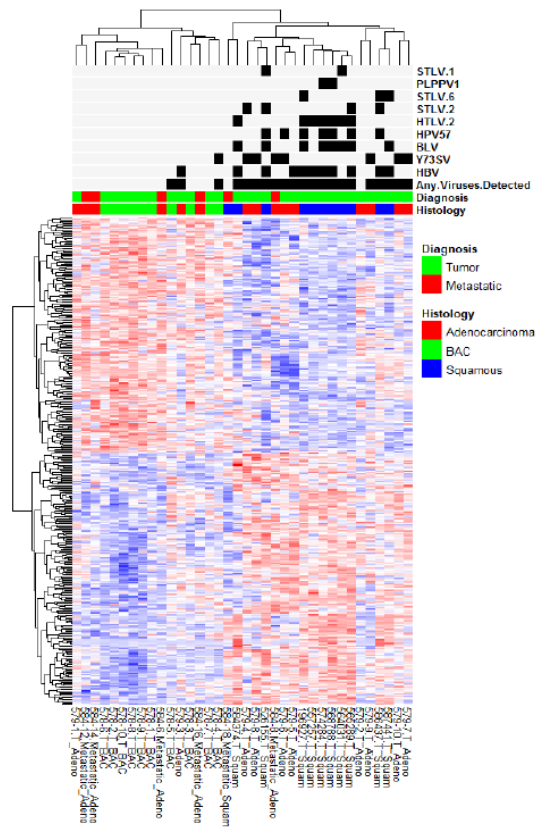

Supplement: MOESM1 [file 16064510]
