# Supplementary material for: Impact of viral presence in tumor on gene expression in non-small cell lung cancer
Source: Springer Nature journal article supplement (doi:10.1186/s12885-018-4748-0), 2018-08-22
Supplement: MOESM2 [file 16064510]

**Supplementary Table 1.** Top 10 Significant Genes with Differential Expression between Virus-infected and uninfected NSCLC Tumor Specimens

| Row | Gene Symbol | Probe set           | Mean In Virus (+) | Mean In Virus (-) | Fold Change (FC) | log <sub>2</sub> FC | Up/Down | P-value  | FDR P-value | Gene Description                                 |
|-----|-------------|---------------------|-------------------|-------------------|------------------|---------------------|---------|----------|-------------|--------------------------------------------------|
| 1   | JMJD1C      | merck-AK024991_at   | 279.6221          | 123.4899          | 0.441632         | 1.142613            | down    | 1.96E-07 | 0.011902    | jumonji domain containing 1C                     |
| 2   | PCYT1A      | merck2-NM_005017_at | 157.9334          | 354.177           | 2.242572         | -1.17424            | up      | 1.54E-06 | 0.031184    | phosphate cytidylyltransferase 1, choline, alpha |
| 3   | CTNNB1      | merck-AF086341_at   | 282.1095          | 129.4862          | 0.458993         | 1.109964            | down    | 1.52E-06 | 0.031184    | catenin beta 1                                   |
| 4   | PCYT1A      | merck-BM560359_a_at | 124.4573          | 268.2678          | 2.155502         | -1.12853            | up      | 3.70E-06 | 0.037416    | phosphate cytidylyltransferase 1, choline, alpha |
| 5   | UFD1L       | merck2-AF141201_at  | 1877.233          | 2694.626          | 1.435424         | -0.53107            | up      | 3.01E-06 | 0.037416    | ubiquitin fusion degradation 1 like (yeast)      |
| 6   | AMN         | merck-NM_030943_at  | 54.76712          | 31.08339          | 0.567556         | 0.778991            | down    | 9.75E-06 | 0.073898    | amion associated transmembrane protein           |
| 7   | XXYL1       | merck-NM_152531_at  | 289.0155          | 613.2811          | 2.121966         | -1.03735            | up      | 1.23E-05 | 0.082644    | xyloside xylosyltransferase 1                    |
| 8   | GNB5        | merck-CR624892_a_at | 85.10777          | 154.6089          | 1.816625         | -0.84122            | up      | 1.93E-05 | 0.083851    | G-protein subunit beta 5                         |
| 9   | OSTF1       | merck-NM_012383_at  | 295.83            | 527.427           | 1.782872         | -0.80764            | up      | 2.35E-05 | 0.083851    | osteoclast stimulating factor 1                  |
| 10  | E2F4        | merck-NM_001950_at  | 450.4585          | 669.1157          | 1.48541          | -0.57578            | up      | 1.53E-05 | 0.083851    | E2F transcription factor 4                       |
