# Supplementary material for: Impact of viral presence in tumor on gene expression in non-small cell lung cancer
Source: Springer Nature journal article supplement (doi:10.1186/s12885-018-4748-0), 2018-08-22

Supplementary Figure 5. Expression Patterns of 12 Genes Differentially Expressed between Virus-infected and Uninfected Squamous Cell Carcinoma

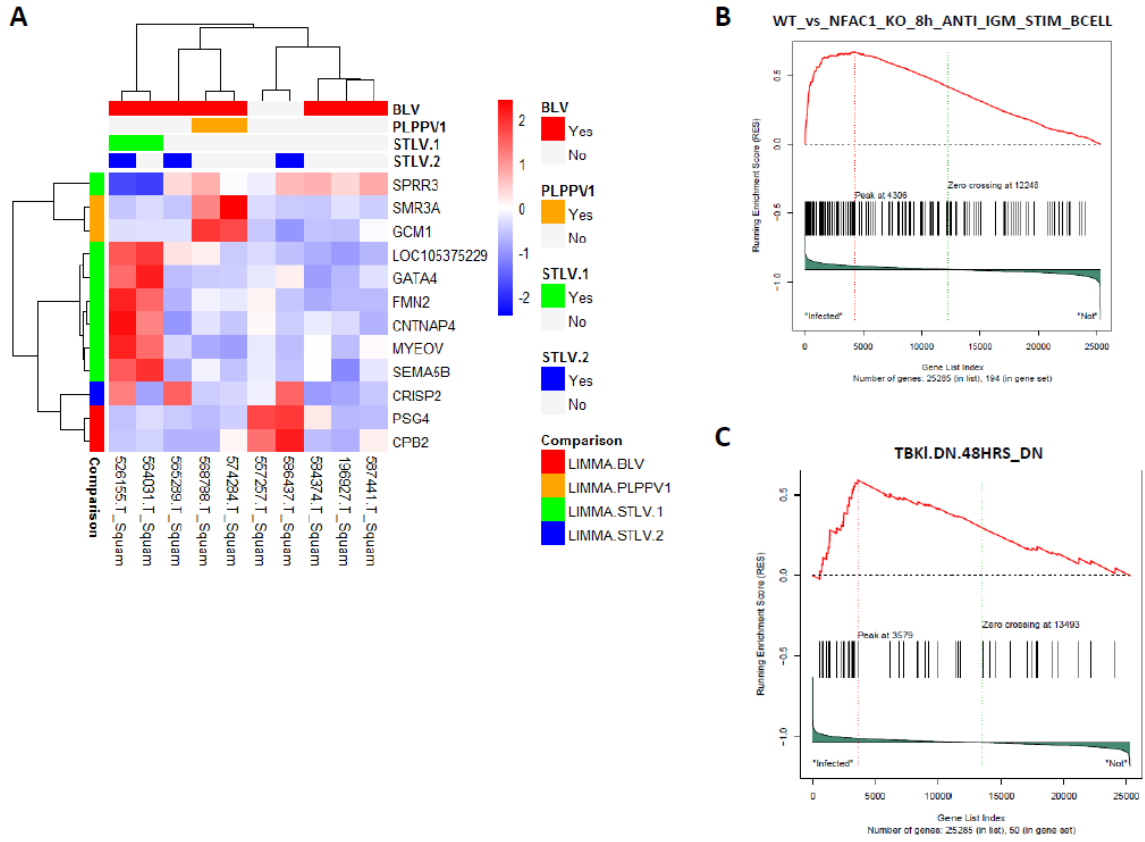

Supplement: MOESM6 [file 16064510]
